# Supplementary material for: Quality of Life for 19,114 participants in the ASPREE (ASPirin in Reducing Events in the Elderly) study and their association with sociodemographic and modifiable lifestyle risk factors
Source: Springer Nature journal article supplement (doi:10.1007/s11136-018-2040-z), 2018-11-08
Supplement: MOESM5 [file 16260812]

**Online Resource 5. Physical and Mental component summary scores of health-related quality of life among individuals ≥65 years according to lifestyle variables in Australia (N=16,703) and the United States (N=2,411). ASPREE study, baseline (2010-2014)**

|  | **PCSa** | |  | **MCSa** | |
| --- | --- | --- | --- | --- | --- |
| **Australia** | **United States** |  | **Australia** | **United States** |
|  | **β (95% CI)** | **β (95% CI)** |  | **β (95% CI)** | **β (95% CI)** |
| **Walking time/day (last two weeks)** | p<0.001 | p<0.001 |  | p=0.066 | p=0.101 |
| None | Ref | Ref |  | Ref | Ref |
| ≤15 min/day | -0.4 (-1.1;0.4) | -1.3 (-2.7;0.1) |  | 0.1 (-0.6;0.7) | 0.5 (-0.9;1.8) |
| 16-30 min/day | 2.7 (2.0;3.3) | 2.3 (0.9;3.7) |  | 0.3 (-0.2;0.9) | -0.1 (-1.5;1.2) |
| >30 min/day | 5.8 (5.1;6.4) | 4.1 (2.8;5.4) |  | 0.5 (-0.1;1.1) | 0.9 (-0.4;2.1) |
| Data not available | 5.1 (2.2;8.0) | 3.8 (-2.0;9.6) |  | 0.7 (-1.8;3.2) | -1.7 (-7.2;3.8) |
| **Alcohol consumption (drinks)** | p<0.001 | p=0.002 |  | p=0.452 | p=0.870 |
| Never | Ref | Ref |  | Ref | Ref |
| None | -1.1 (-1.8;-0.5) | -0.1 (-1.3;1.1) |  | -0.2 (-0.8;0.3) | -0.4 (-1.5;0.7) |
| Current – 1-2 drinks | 0.5 (0.1;0.9) | 1.5 (0.6;2.3) |  | -0.1 (-0.4;0.2) | 0.1 (-0.7;0.9) |
| Current – 3-4 drinks | 0.0 (-0.5;0.5) | 0.7 (-1.1;2.5) |  | 0.0 (-0.4;0.4) | -0.3 (-2.0;1.4) |
| Current – 5+ drinks | -0.6 (-1.5;0.2) | 0.7 (-2.6;3.9) |  | -0.6 (-1.4;0.1) | 0.6 (-2.4;3.6) |
| **Smoking status** | p<0.001 | p=0.013 |  | p=0.003 | p=0.009 |
| Never | Ref | Ref |  | Ref | Ref |
| Past <20 cigarettes | -0.6 (-0.9;-0.2) | -0.2 (-1.0;0.6) |  | -0.3 (-0.6;-0.1) | -0.1 (-0.9;0.7) |
| Past 20+ cigarettes | -1.9 (-2.3;-1.5) | -0.7 (-1.7;0.4) |  | -0.2 (-0.5;0.1) | 0.8 (-0.2;1.8) |
| Current <20 cigarettes | -0.7 (-1.5;0.2) | -2.4 (-3.8;-0.9) |  | -1.2 (-1.9;-0.5) | -1.4 (-2.8;-0.1) |
| Current 20+ cigarettes | -2.5 (-3.8;-1.2) | -2.7 (-6.3;0.9) |  | -0.5 (-1.6;0.6) | -3.7 (-7.1;-0.4) |

Abbreviations: PCS = Physical component score, MCS = Mental component score, SEIFA-IRSAD = Socio-Economic Indexes for Areas Index of Relative Socio-economic Advantage and Disadvantaged, β = Regression coefficient.

a – β and 95% CI are adjusted for all sociodemographic variables in each country and mutual adjustment of all lifestyle variables. P-values in the table represent differences in PCS or MCS according to lifestyle variables within each country
